# Supplementary material for: EMSY expression affects multiple components of the skin barrier with relevance to atopic dermatitis
Source: PubMed Central journal article supplement (PMC6683598; doi:10.1016/j.jaci.2019.05.024), 2019-08

## SUPPLEMENTARY FIGURES AND TABLES - continued

### ***EMSY* expression affects multiple components of skin barrier with relevance to atopic dermatitis**

Martina S Elias PhD,<sup>1\*</sup> Sheila C Wright HNC,<sup>1</sup> Judit Remenyi PhD,<sup>1</sup> James C Abbott PhD<sup>2</sup>, Susan E Bray PhD<sup>3</sup>, Christian Cole PhD<sup>2</sup>, Sharon Edwards MBChB<sup>4</sup>, Marek Gierlinski PhD<sup>2</sup>, Mateusz Glok<sup>1</sup>, John A McGrath FRCP<sup>5</sup>, William V Nicholson PhD<sup>1</sup>, Lavinia Paternoster PhD<sup>6</sup>, Alan R Prescott PhD<sup>7</sup>, Sara Ten Have PhD<sup>8</sup>, Phillip D Whitfield PhD<sup>9</sup>, Angus I Lamond PhD<sup>8</sup> and Sara J Brown FRCPE<sup>1,10\*</sup>

**Fig E8. qPCR, Western blotting and immunofluorescence to test for validation of selected protein expression changes identified by mass spec analysis**

| Gene          | Protein                             | Mean FC in m/s proteomics (n=4)                     | Function                       | qPCR (fold change n=4, mean $\pm$ SEM) | Western blotting (representative images from $\geq 4$ bio-replicates)                 | Immunostaining (representative images from $\geq 3$ bio-replicates)                 |
|---------------|-------------------------------------|-----------------------------------------------------|--------------------------------|----------------------------------------|---------------------------------------------------------------------------------------|-------------------------------------------------------------------------------------|
| <i>EMSY</i>   | EMSY                                | Below threshold for detection in mass spec analysis | Transcriptional regulator      | $0.68 \pm 0.04$                        | 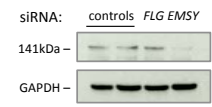   |  |
| <i>FLG</i>    | Filaggrin                           | 12.5                                                | Structural and multifunctional | $5.07 \pm 4.78$                        |    |  |
| <i>FLG2</i>   | Filaggrin 2                         | 38.1                                                |                                | $25.28 \pm 19.57$                      |    | Not done                                                                            |
| <i>KRT2</i>   | Keratin 2                           | 7.9                                                 |                                | $41.90 \pm 34.94$                      |   | Immunofluorescence images shown following this table                                |
| <i>HAL</i>    | Histidine ammonia lyase             | 11.9                                                |                                | $17.92 \pm 14.23$                      |  | Immunofluorescence images shown following this table                                |
| <i>BLMH</i>   | Bleomycin hydrolase                 | 5.8                                                 | Filaggrin processing           | $8.50 \pm 2.78$                        | Not done                                                                              | Not done                                                                            |
| <i>ASPRV1</i> | Retroviral-like aspartic protease 1 | 11.8                                                |                                | $43.92 \pm 36.25$                      | Not done                                                                              | Not done                                                                            |

| Gene           | Protein                                    | Mean FC in m/s proteomics (n=4) | Function                        | qPCR (fold change n=4, mean ± SEM) | Western blotting (representative images from ≥4 bio-replicates)                       | Immunofluorescence (representative images from ≥3 bio-replicates) |
|----------------|--------------------------------------------|---------------------------------|---------------------------------|------------------------------------|---------------------------------------------------------------------------------------|-------------------------------------------------------------------|
| <i>STS</i>     | Steroid sulphatase                         | 7.3                             | Lipid processing and metabolism | 1.25 ± 0.45                        | 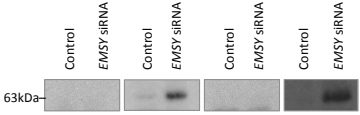   | Nonspecific staining                                              |
| <i>ALOXE3</i>  | Arachidonate lipoxygenase 3                | 9.7                             |                                 | 4.84 ± 1.25                        |    | Nonspecific staining                                              |
| <i>ALOX12B</i> | Arachidonate lipoxygenase 12               | 7.4                             |                                 | 5.43 ± 2.61                        |    | Immunofluorescence images shown following this table              |
| <i>APOE</i>    | Apolipoprotein E                           | 3.1                             |                                 | 1.87 ± 0.36                        | Not done                                                                              | Not done                                                          |
| <i>CDSN</i>    | Corneodesmosin                             | 51.6                            | Cell-cell adhesion              | 56.38 ± 50.78                      |   | Immunofluorescence images shown following this table              |
| <i>DSC1</i>    | Desmocollin 1                              | 7.2                             |                                 | 2.90 ± 0.47                        |  | Immunofluorescence images shown following this table              |
| <i>GJA1</i>    | Gap junction alpha-1 protein (connexin 43) | 2.5                             | Cell-cell communication         | 1.21 ± 0.27                        |  | Nonspecific staining                                              |

| Gene          | Protein                                    | Mean FC in m/s proteomics (n=4) | Function                          | qPCR (fold change n=4, mean ± SEM) | Western blotting (representative images from ≥4 bio-replicates)                     | Immunofluorescence (representative images from ≥3 bio-replicates) |
|---------------|--------------------------------------------|---------------------------------|-----------------------------------|------------------------------------|-------------------------------------------------------------------------------------|-------------------------------------------------------------------|
| <i>IL36RN</i> | Interleukin-36 receptor antagonist protein | 4.2                             | Control of inflammation           | 6.70 ± 4.03                        | 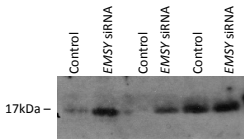 | Nonspecific staining                                              |
| <i>mTOR</i>   | Mechanistic target of rapamycin            | 0.3                             | Cell cycle and cell proliferation | 1.36 ± 0.25                        |  | Immunofluorescence images shown following this table              |
| <i>CDK1</i>   | Cyclin-dependent kinase 1                  | 6.8                             | Cell cycle                        | 1.32 ± 0.21                        | Not done                                                                            | Not done                                                          |
| <i>COL7A1</i> | Collagen alpha-1 7 chain                   | 5.3                             | Basement membrane                 | 1.46 ± 0.53                        | Not done                                                                            | No clear staining seen                                            |
| <i>RNase7</i> | Ribonuclease 7                             | 20.5                            | Antimicrobial                     | 17.76 ± 15.13                      | Not done                                                                            | Not done                                                          |

Keratin 2 DAPI

Composite image created by Zeiss LSM710 microscope

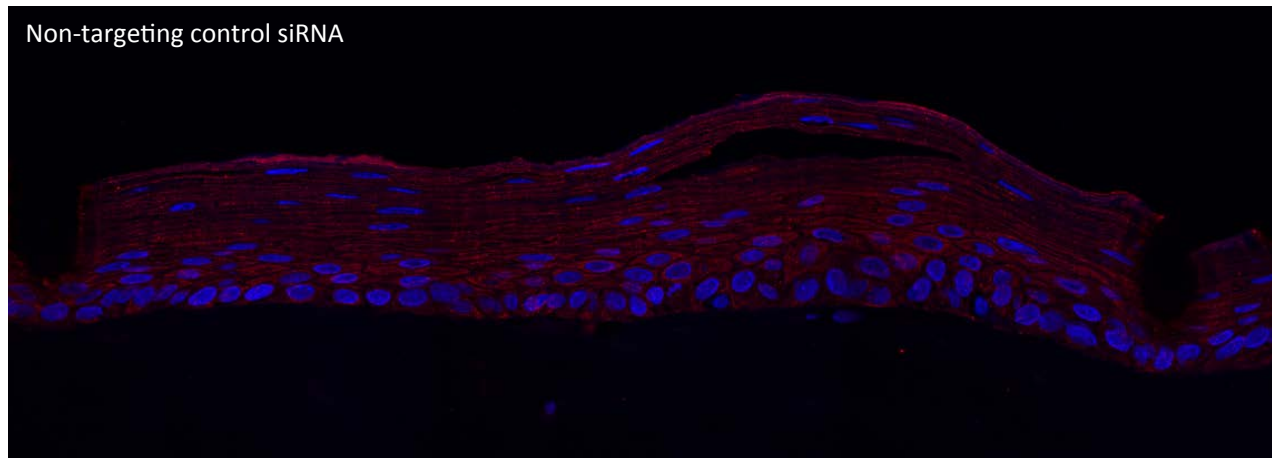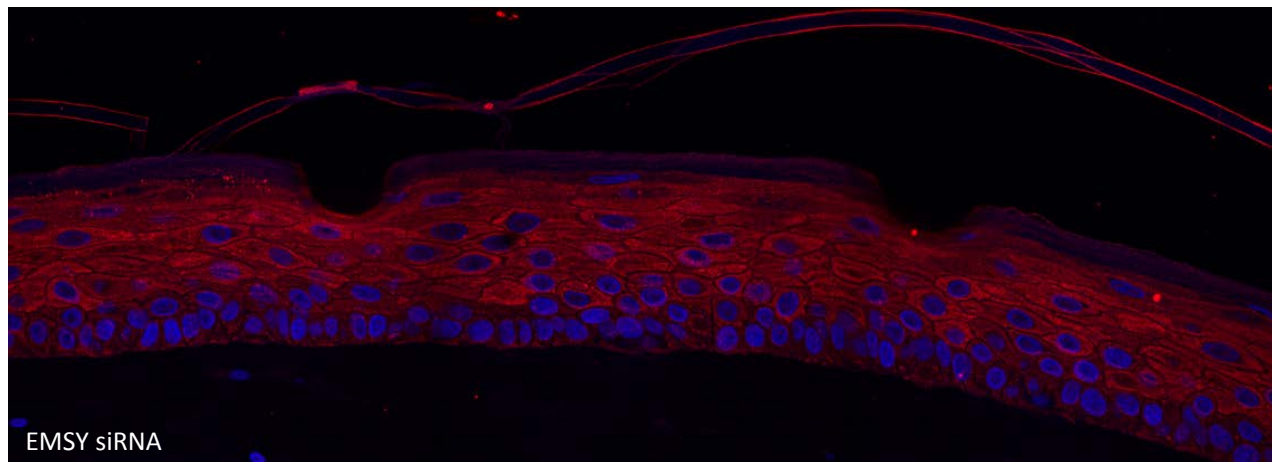

Histidine ammonia lyase DAPI

Composite image created by Zeiss LSM710 microscope

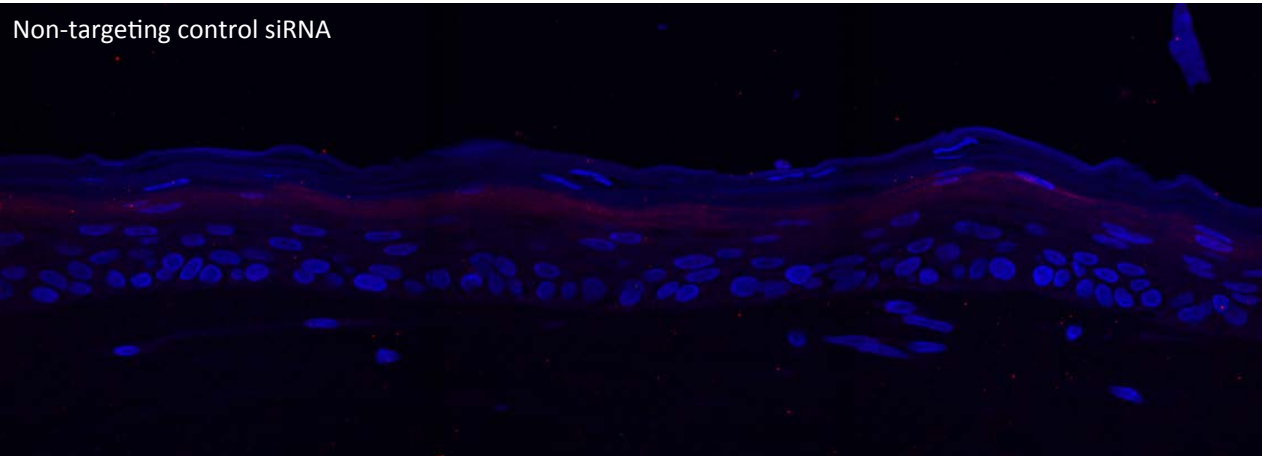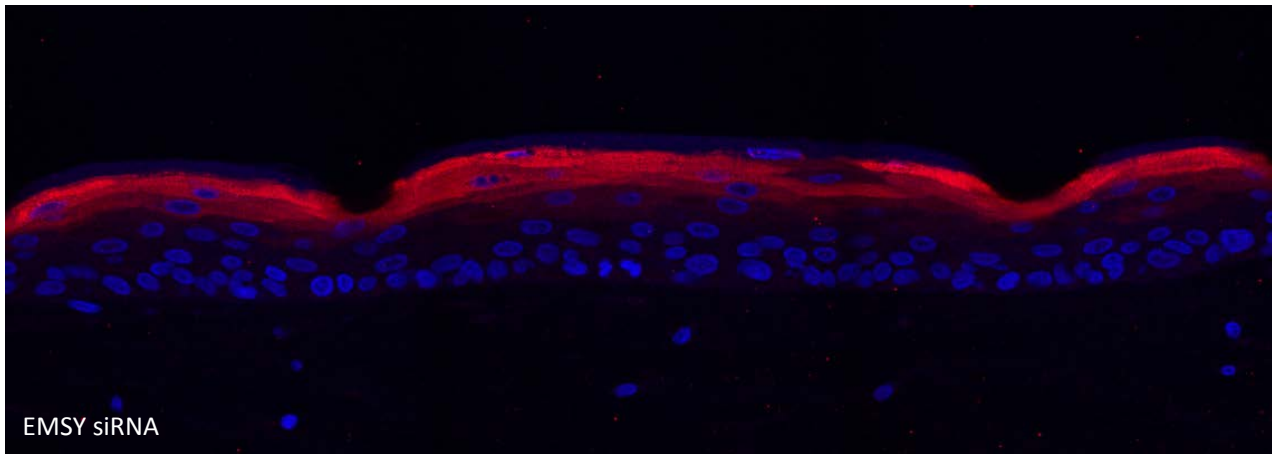

ALOX12 DAPI

Composite image created by Zeiss LSM710 microscope

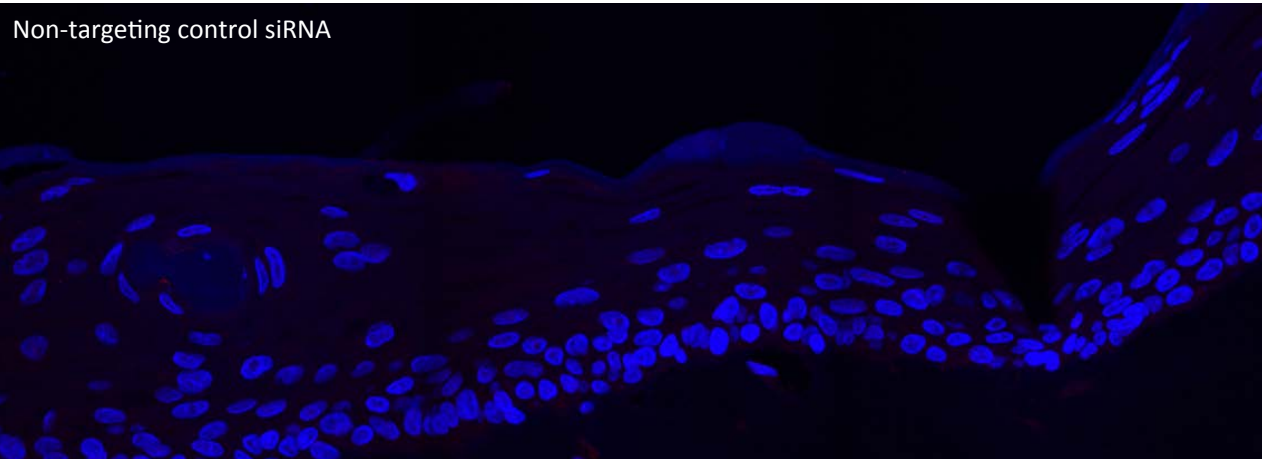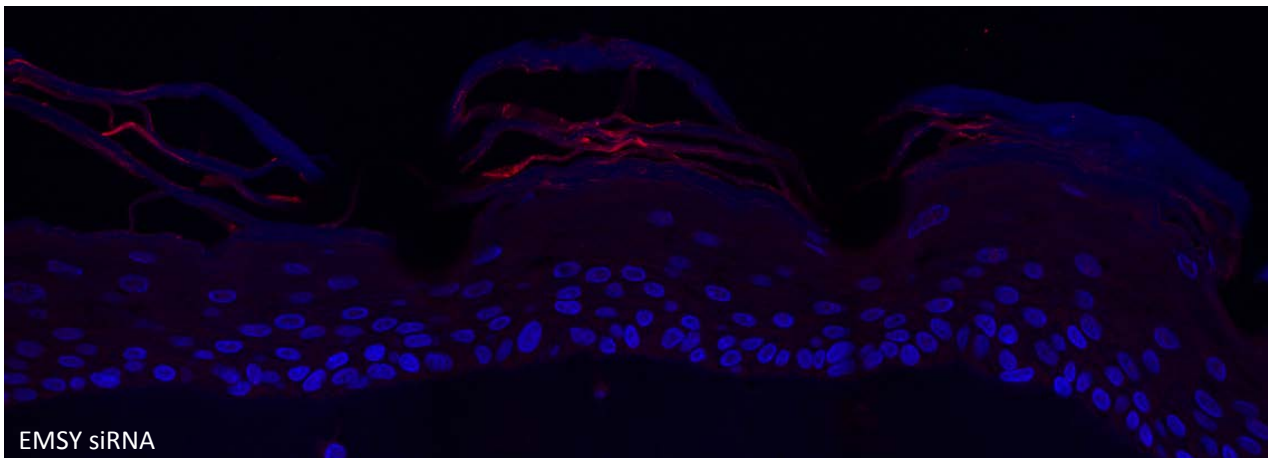

Corneodesmosin DAPI  
Composite image created by Zeiss LSM710 microscope

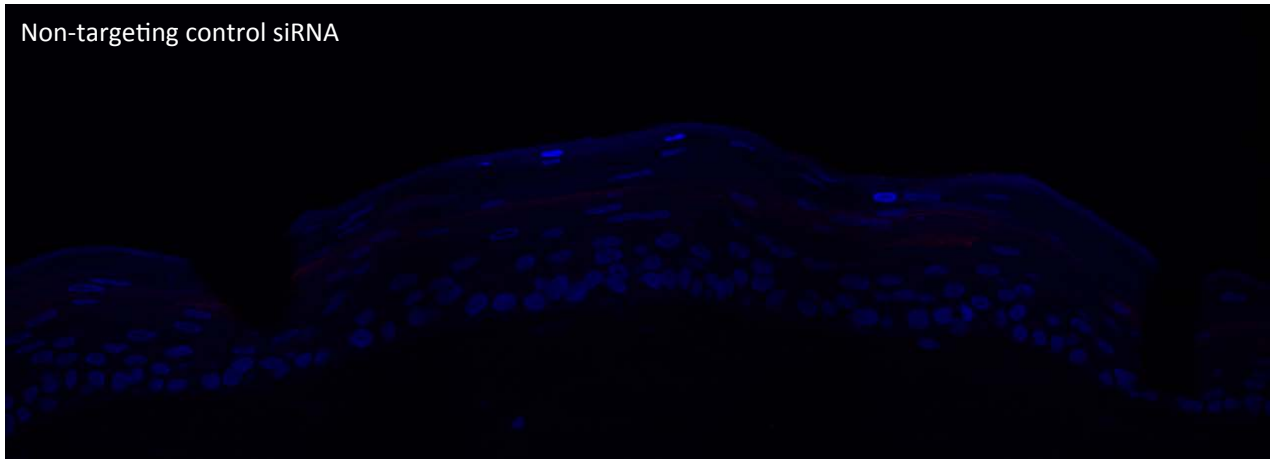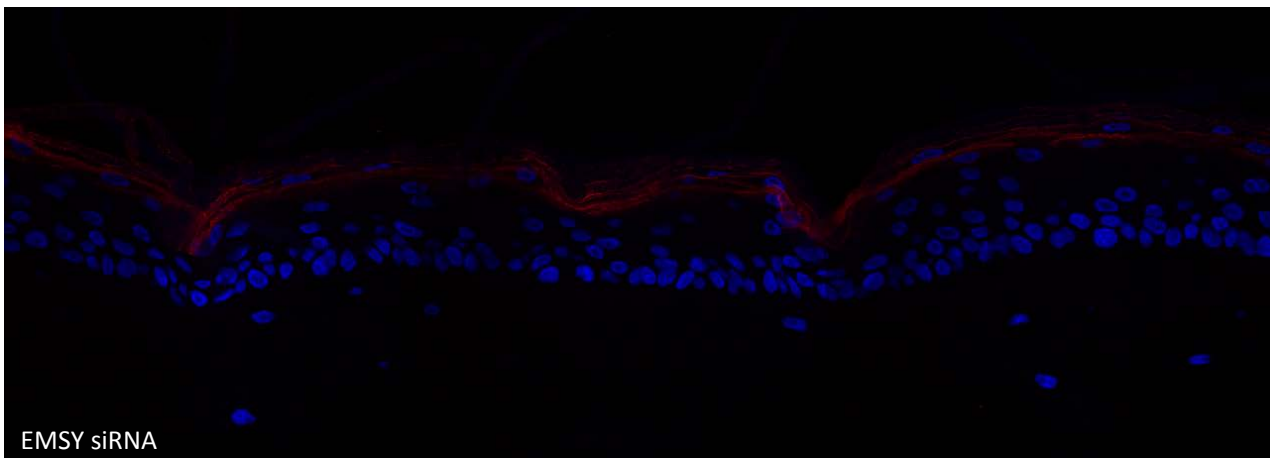



Desmocollin DAPI

Composite image created by Zeiss LSM710 microscope

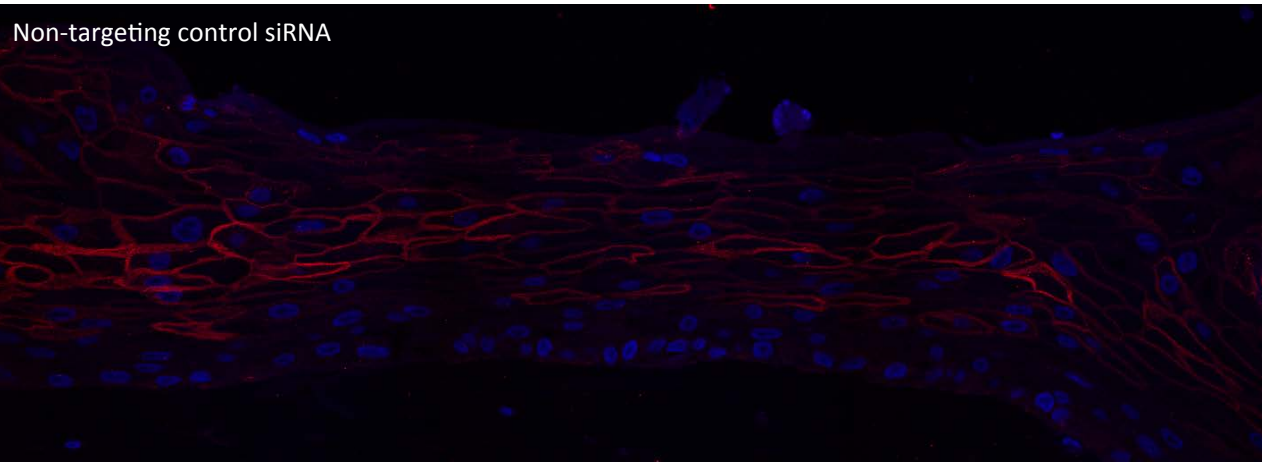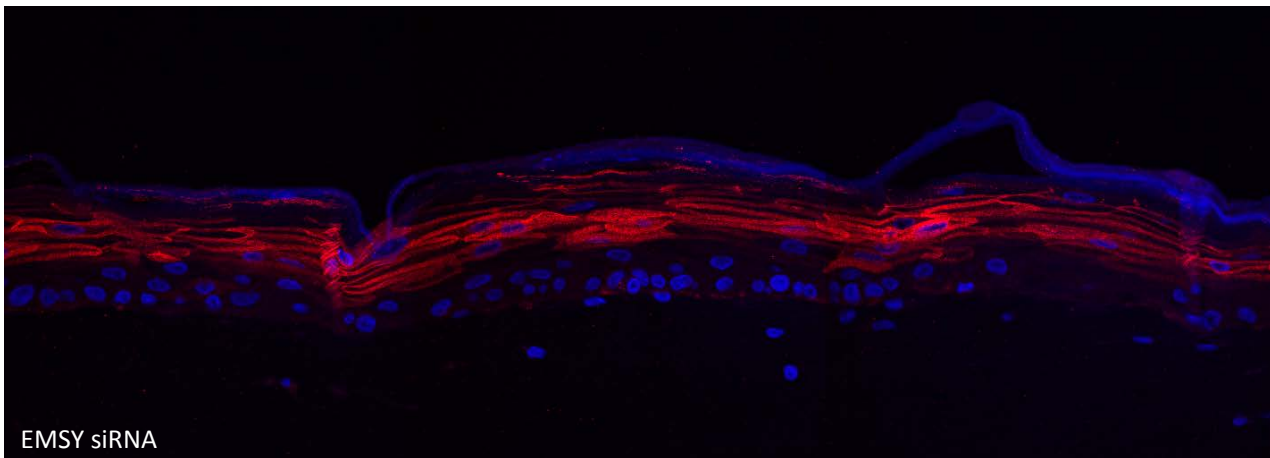

mTOR DAPI

Composite image created by Zeiss LSM710 microscope

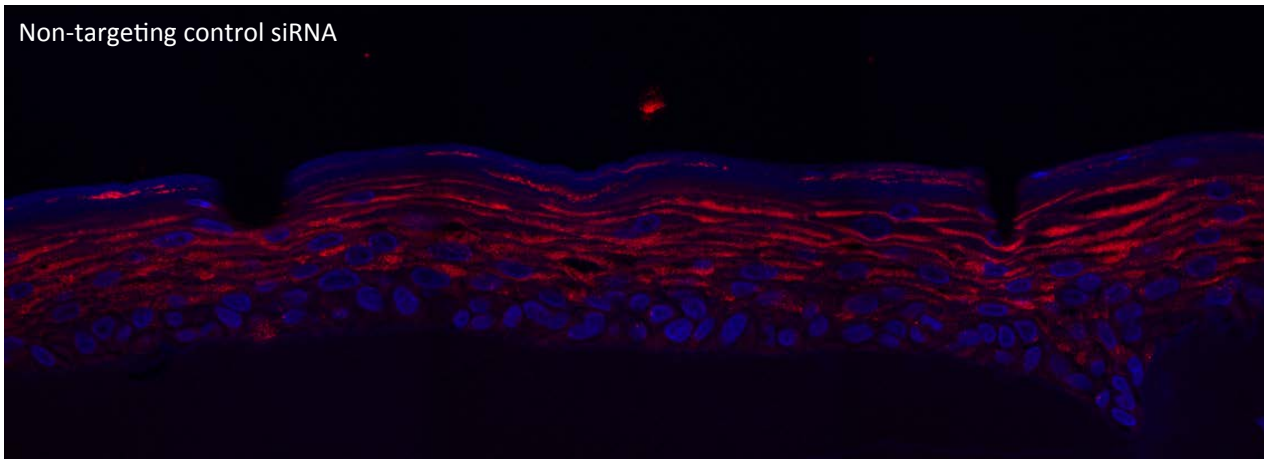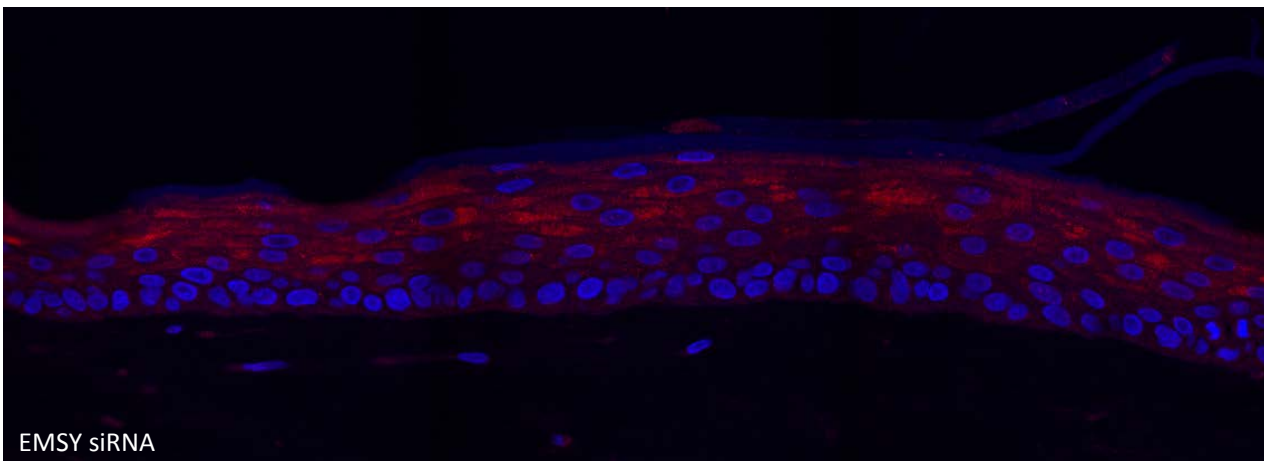

Supplement: mmc3.pdf [file mmc3.pdf]
