# Supplementary material for: EMSY expression affects multiple components of the skin barrier with relevance to atopic dermatitis
Source: PubMed Central journal article supplement (PMC6683598; doi:10.1016/j.jaci.2019.05.024), 2019-08
Supplement: mmc2.pdf [file mmc2.pdf]

## SUPPLEMENTARY FIGURES AND TABLES

### ***EMSY* expression affects multiple components of skin barrier with relevance to atopic dermatitis**

Martina S Elias PhD,<sup>1\*</sup> Sheila C Wright HNC,<sup>1</sup> Judit Remenyi PhD,<sup>1</sup> James C Abbott PhD<sup>2</sup>,  
Susan E Bray PhD<sup>3</sup>, Christian Cole PhD<sup>2</sup>, Sharon Edwards MBChB<sup>4</sup>, Marek Gierlinski PhD<sup>2</sup>, Mateusz Glok<sup>1</sup>,  
John A McGrath FRCP<sup>5</sup>, William V Nicholson PhD<sup>1</sup>, Lavinia Paternoster PhD<sup>6</sup>, Alan R Prescott PhD<sup>7</sup>, Sara  
Ten Have PhD<sup>8</sup>, Phillip D Whitfield PhD<sup>9</sup>, Angus I Lamond PhD<sup>8</sup> and Sara J Brown FRCPE<sup>1,10\*</sup>

**Fig E1. Chromosomal conformation data analysis**

**a Hi-C data browser (hg19)**

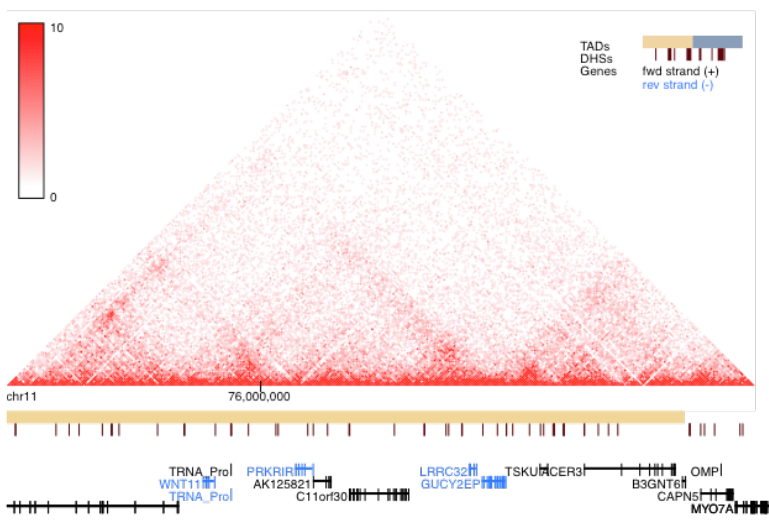

**b Promoter-capture Hi-C data analysis**

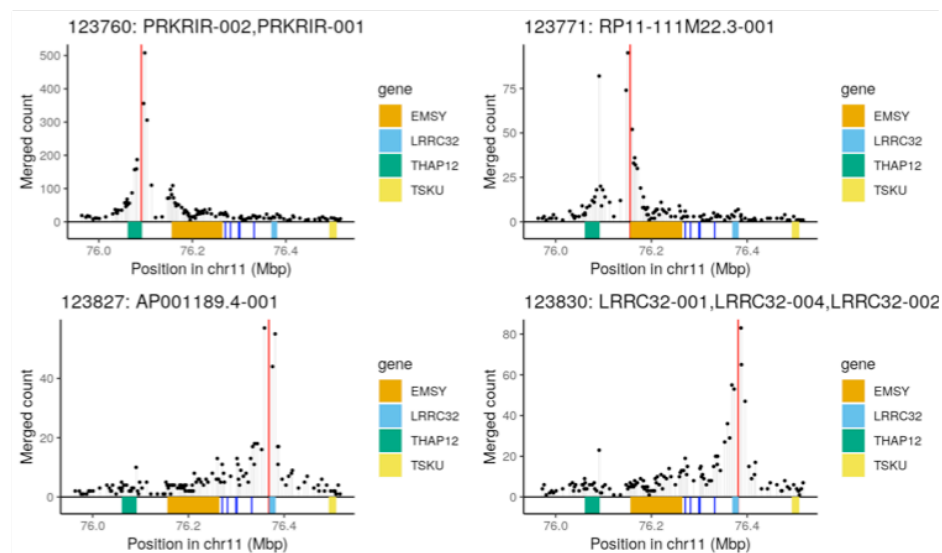

**a.** Data from Rao *et al.* (2014) generated using normal human keratinocytes, displayed in the Hi-C data browser from Yue lab, Penn State, USA [http://promoter.bx.psu.edu/hi-c/view.php?method=Hi-C&species=human&assembly=hg19&source=inside&tissue=NHEK&type=Lieberman-row&resolution=5&c\\_url=&transfer=&gene=&chr=chr11&start=75553333.333333&end=76871666.666667&sessionID=&browser=none](http://promoter.bx.psu.edu/hi-c/view.php?method=Hi-C&species=human&assembly=hg19&source=inside&tissue=NHEK&type=Lieberman-row&resolution=5&c_url=&transfer=&gene=&chr=chr11&start=75553333.333333&end=76871666.666667&sessionID=&browser=none)

**b.** Data from Rubin *et al.* (2017) generated using normal human keratinocytes in duplicate experiments. Results are shown for day 0; cells differentiated to days 3 and 6 gave very similar results. Coloured rectangles indicate position of the genes and blue lines show the SNP positions. The vertical red line is the location of the bait. Plots shows read count added across the two replicate experiments. There is some evidence of an interaction between the SNP region and *LRRC32*, but an interaction with *EMSY* cannot be excluded.

**Fig E2. Direct (single molecule) RNA sequencing of atopic skin compared to non-atopic control skin**

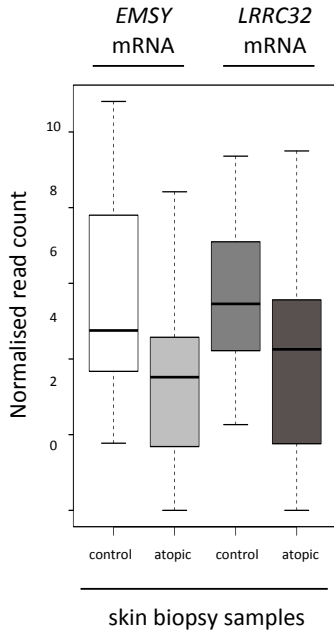

Direct RNA sequencing analysis (48) of skin biopsies from the clinically uninfamed skin of paediatric AD patients (n=26) and site-matched non-atopic control skin (n=10); box plots show median, first and third quartiles, whiskers extend to most extreme data point <1.5 x interquartile range; p>0.05

Details of the donor phenotypes and demographic details are reported in Cole *et al.* (2014).

**Fig E3. Comparison of effects of individual and pooled EMSY-siRNAs**

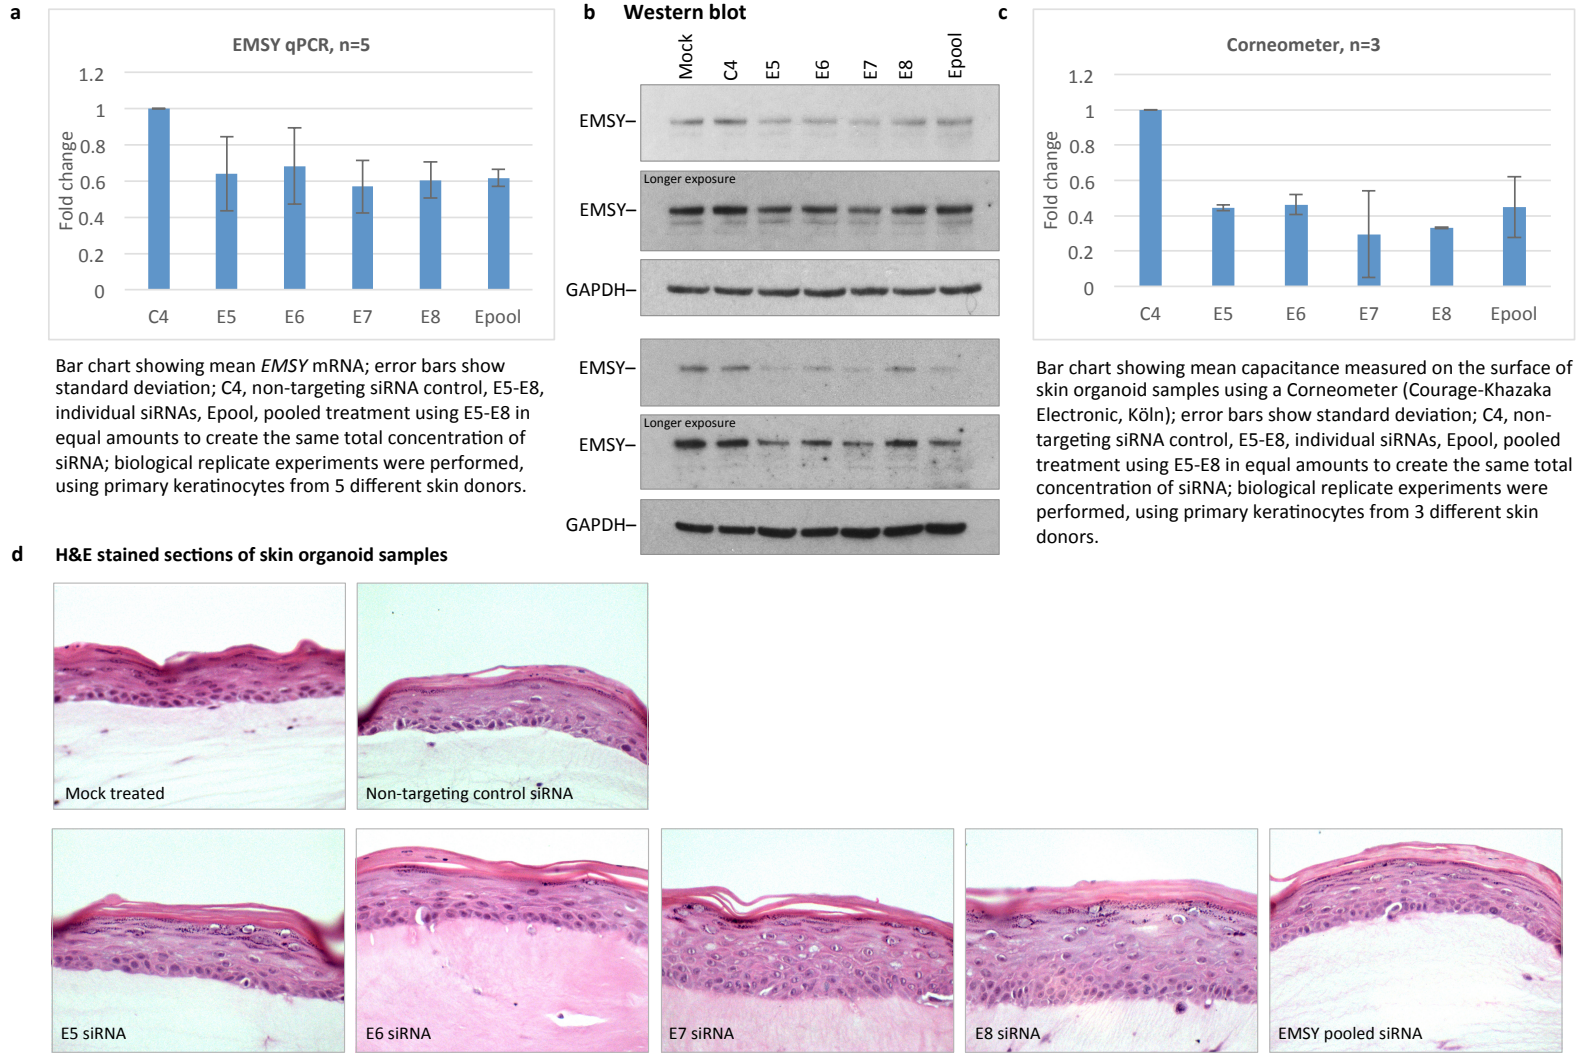

Bar chart showing mean EMSY mRNA; error bars show standard deviation; C4, non-targeting siRNA control, E5-E8, individual siRNAs, Epool, pooled treatment using E5-E8 in equal amounts to create the same total concentration of siRNA; biological replicate experiments were performed, using primary keratinocytes from 5 different skin donors.

Bar chart showing mean capacitance measured on the surface of skin organoid samples using a Corneometer (Courage-Khazaka Electronic, Köln); error bars show standard deviation; C4, non-targeting siRNA control, E5-E8, individual siRNAs, Epool, pooled treatment using E5-E8 in equal amounts to create the same total concentration of siRNA; biological replicate experiments were performed, using primary keratinocytes from 3 different skin donors.

Histological sections showing appearance of organoid samples untreated (mock) and treated with control (non-targeting siRNA), individual EMSY-siRNAs (E5, E6, E7, E8) and the pool of these four siRNAs in equal amounts to make the same concentration; similar findings were replicated in a total of three donors.

**Fig E4. Time course showing organoid development and measurements of barrier formation**

**a H&E staining of skin organotypic cultures**

Time after lifting culture to the air-liquid interface

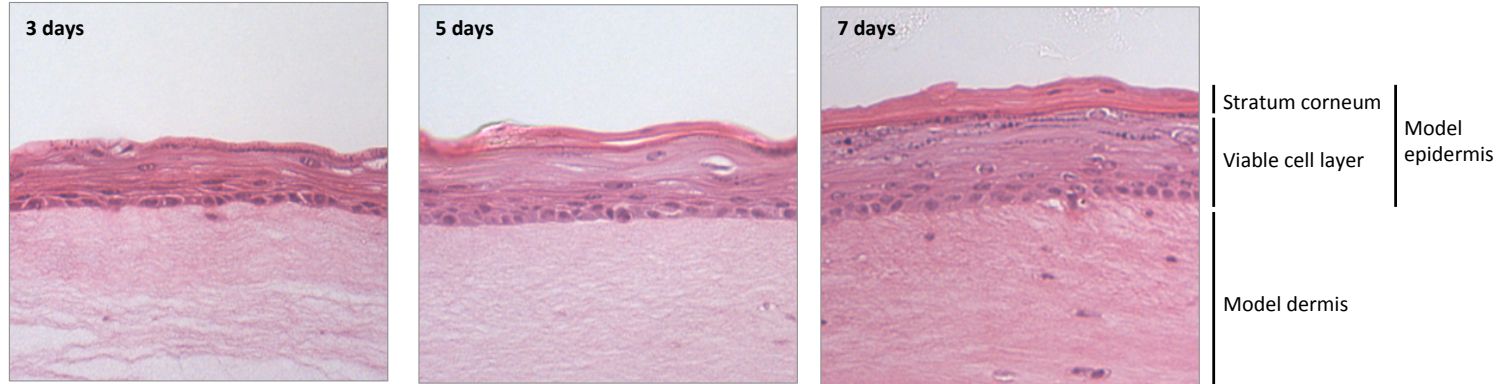

**b Measurement of barrier function**

Water content of stratum corneum, measured using corneometer  
 Transepidermal water loss (TEWL), measured using Aquaflux (Biox, London, UK)

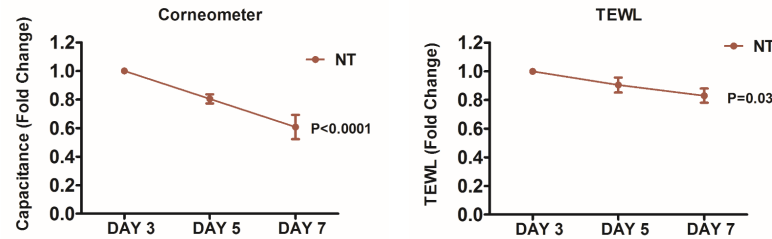

**c Lucifer yellow dye penetration**

Time after lifting culture to the air-liquid interface  
 50ul of 1mM dye placed on surface of organotypic skin contained within a metal ring  
 Incubated at 37°C for 4 hours  
 Image and image analysis performed with Zeiss LSM710 fluorescent microscope  
 [Note this figure is reproduced for comparison in Fig 3C.]

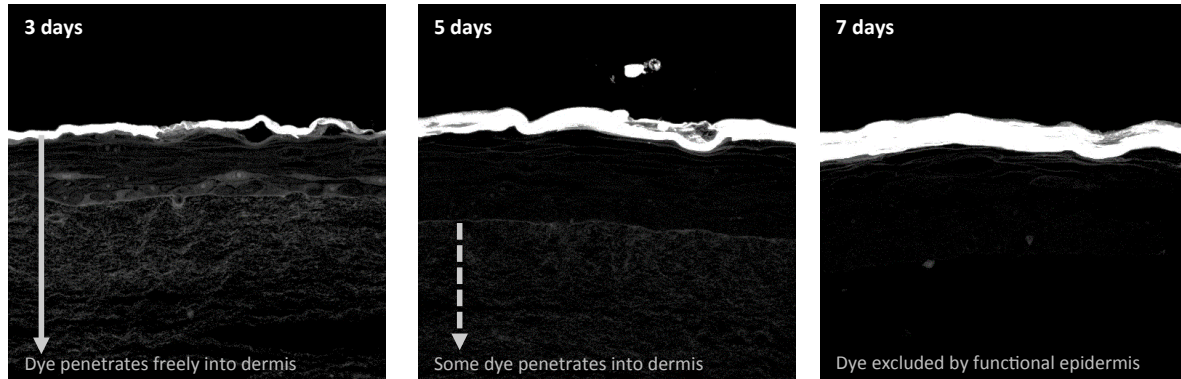

**Fig E5. EMSY over-expression in primary human keratinocytes leads to a reduction in markers of terminal differentiation and barrier function, consistent with changes previously reported to occur in AD.**

Data shown are from 3 biological replicates (primary keratinocytes from 3 separate donors) in which *EMSY* mRNA was increased 10-fold, 22-fold and 47-fold compared to GFP-empty vector-treated keratinocytes (Figure 2J).

**a qPCR analysis**

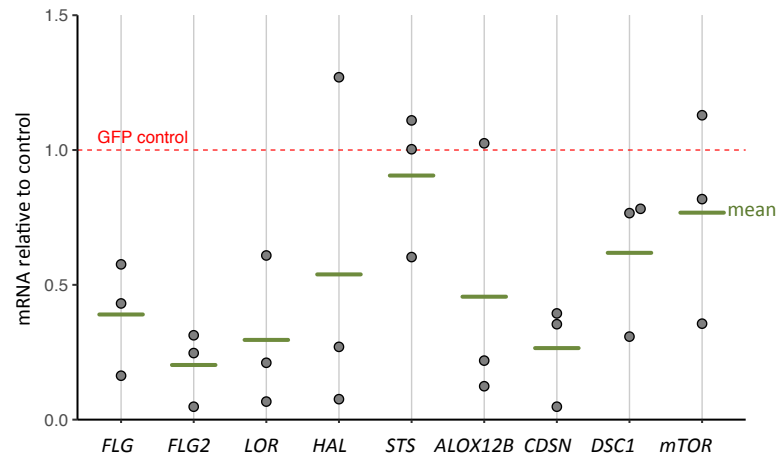

**b Western blotting**

Additional results from experiment shown in Fig. 2I-2m in which *EMSY* mRNA increased 47-fold

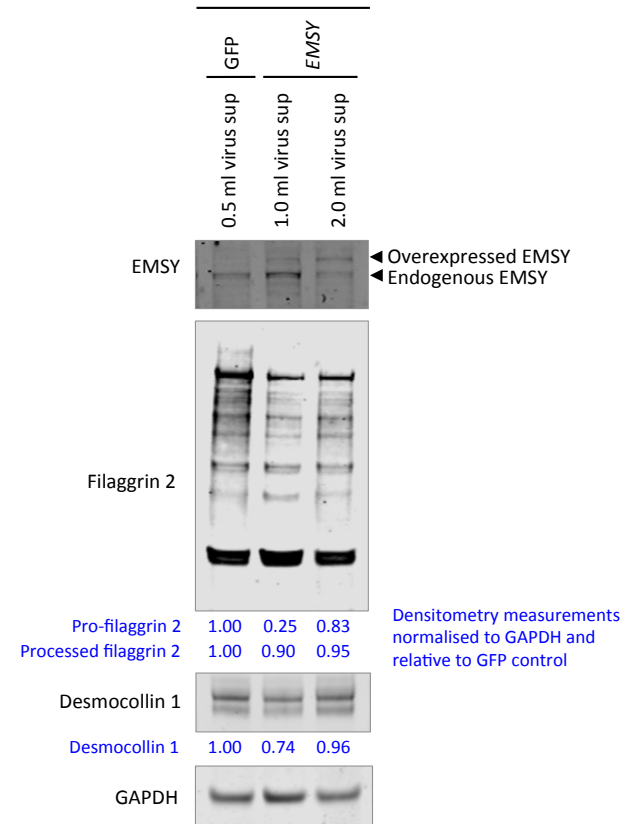

c

Replicate in which *EMSY* mRNA increased 22-fold

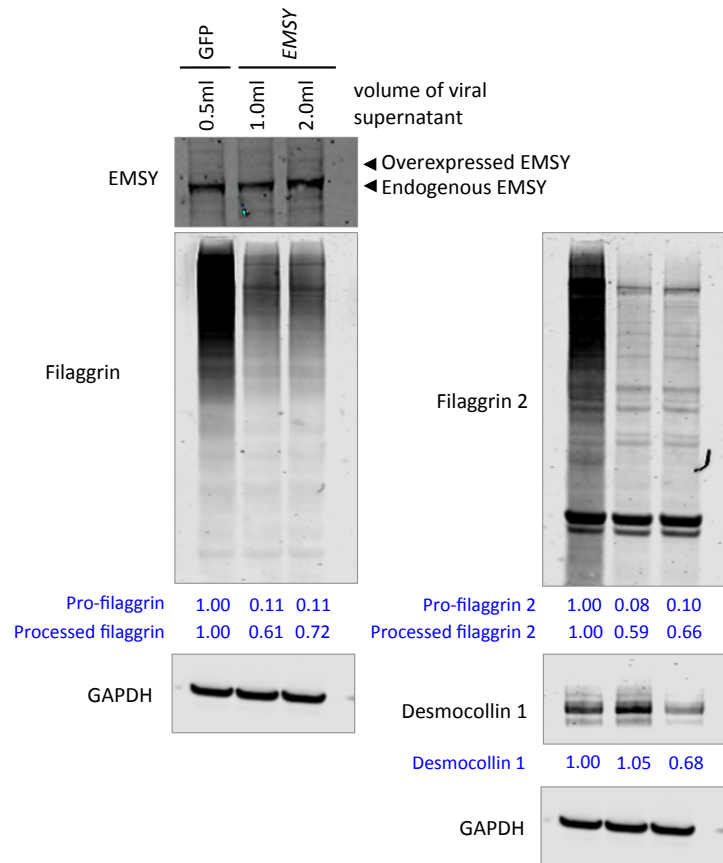

d

Replicate in which *EMSY* mRNA increased 10-fold

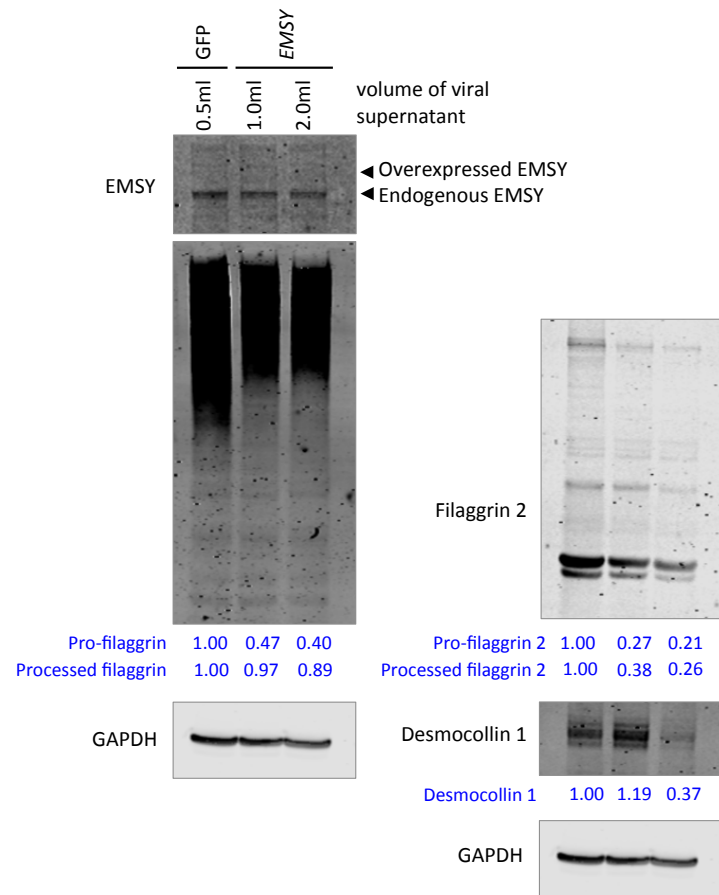

Densitometry measurements are normalised to GAPDH and relative to GFP control; ImageStudio

**Fig E6. Mass spectrometry proteomic analysis quality control assessments.**

**a Histograms showing distribution of proteins quantified in each experiment**

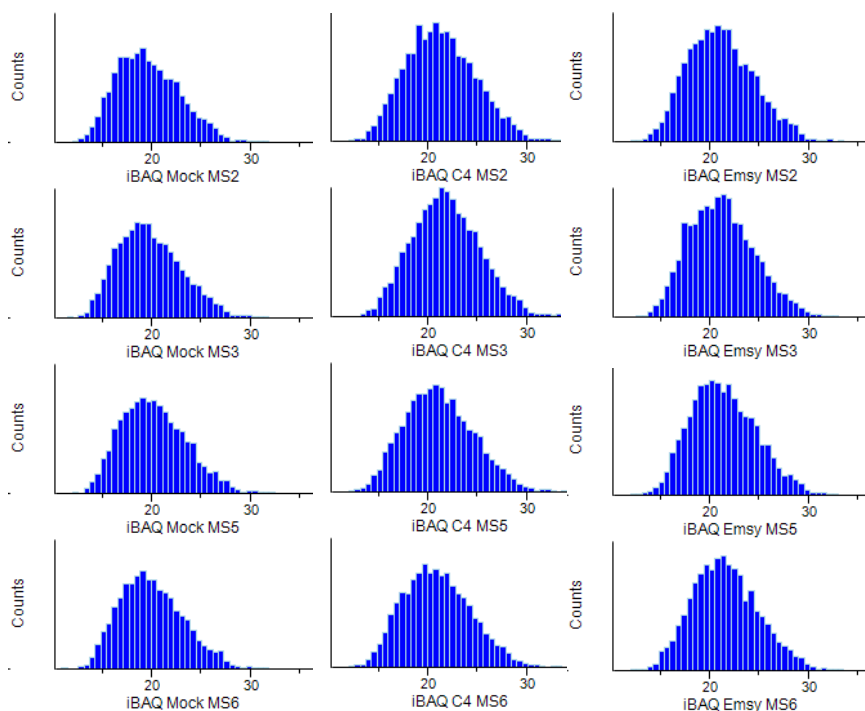

Bins on the x-axis contain the log<sub>2</sub> intensity-based absolute quantification (iBAQ, sum of intensities of tryptic peptides for each protein divided by number of theoretically observable peptides); normalised counts of the proteins in each bin are shown on the y-axis; MS2, MS3, MS5 and MS6 are biological replicate experiments from different human donors; mock, untreated control organoid; C4, non-targeting control treated organoid; Emsy, EMSY si-RNA treated organoid.

**b Correlation of protein abundance from replicate analyses**

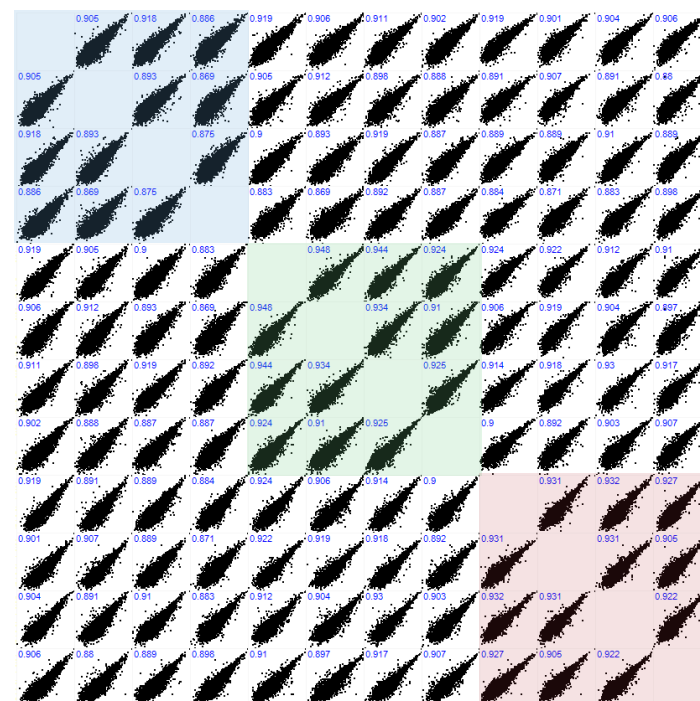

Non-targeting control  
 EMSY-siRNA treated  
 Mock-treated samples

x and y axes show iBAQ intensities of samples mapped against replicate analysis; biological replicates are highly correlated (Pearson correlation coefficient  $\geq 0.86$ )



**Fig E7.**

**(a) Gene Ontology analysis of 154 proteins up-regulated in organoid skin with EMSY knock-down; results where FDR p<0.05**

**Biological process**

| Analysis Type:                                            | PANTHER Overrepresentation Test (Released 20181113) |                |                     |                       |                            |                        |                |
|-----------------------------------------------------------|-----------------------------------------------------|----------------|---------------------|-----------------------|----------------------------|------------------------|----------------|
| Annotation Version and Release Date:                      | GO Ontology database Released 2018-11-15            |                |                     |                       |                            |                        |                |
| Analyzed List:                                            | upload_1 (Homo sapiens)                             |                |                     |                       |                            |                        |                |
| Reference List:                                           | Homo sapiens (all genes in database)                |                |                     |                       |                            |                        |                |
| Test Type:                                                | FISHER                                              |                |                     |                       |                            |                        |                |
| Correction:                                               | FDR                                                 |                |                     |                       |                            |                        |                |
| GO biological process complete                            | Homo sapiens - REFLIST (21042)                      | upload_1 (161) | upload_1 (expected) | upload_1 (over/under) | upload_1 (fold Enrichment) | upload_1 (raw P-value) | upload_1 (FDR) |
| establishment of skin barrier (GO:0061436)                | 21                                                  | 4              | 0.16 +              | 24.89                 | 3.58E-05                   | 3.14E-02               |                |
| regulation of water loss via skin (GO:0033561)            | 23                                                  | 4              | 0.18 +              | 22.73                 | 4.90E-05                   | 3.87E-02               |                |
| cornification (GO:0070268)                                | 112                                                 | 7              | 0.86 +              | 8.17                  | 3.51E-05                   | 3.46E-02               |                |
| cellular response to toxic substance (GO:0097237)         | 201                                                 | 9              | 1.54 +              | 5.85                  | 3.36E-05                   | 3.54E-02               |                |
| autophagy (GO:0006914)                                    | 245                                                 | 10             | 1.87 +              | 5.33                  | 2.63E-05                   | 3.45E-02               |                |
| process utilizing autophagic mechanism (GO:0061919)       | 245                                                 | 10             | 1.87 +              | 5.33                  | 2.63E-05                   | 3.19E-02               |                |
| skin development (GO:0043588)                             | 376                                                 | 12             | 2.88 +              | 4.17                  | 4.28E-05                   | 3.56E-02               |                |
| ncRNA metabolic process (GO:0034660)                      | 537                                                 | 15             | 4.11 +              | 3.65                  | 2.13E-05                   | 3.06E-02               |                |
| RNA processing (GO:0006396)                               | 850                                                 | 20             | 6.5 +               | 3.08                  | 1.03E-05                   | 2.03E-02               |                |
| cell death (GO:0008219)                                   | 1073                                                | 22             | 8.21 +              | 2.68                  | 2.90E-05                   | 3.27E-02               |                |
| programmed cell death (GO:0012501)                        | 1038                                                | 21             | 7.94 +              | 2.64                  | 5.41E-05                   | 4.06E-02               |                |
| cellular catabolic process (GO:0044248)                   | 1736                                                | 30             | 13.28 +             | 2.26                  | 3.56E-05                   | 3.31E-02               |                |
| catabolic process (GO:0009056)                            | 1972                                                | 33             | 15.09 +             | 2.19                  | 1.80E-05                   | 3.15E-02               |                |
| gene expression (GO:0010467)                              | 1986                                                | 33             | 15.2 +              | 2.17                  | 2.02E-05                   | 3.19E-02               |                |
| nucleic acid metabolic process (GO:0090304)               | 2293                                                | 35             | 17.54 +             | 1.99                  | 6.72E-05                   | 4.82E-02               |                |
| cellular nitrogen compound metabolic process (GO:0034641) | 3575                                                | 51             | 27.35 +             | 1.86                  | 7.06E-06                   | 1.59E-02               |                |
| cellular metabolic process (GO:0044237)                   | 7584                                                | 92             | 58.03 +             | 1.59                  | 8.77E-08                   | 6.92E-04               |                |
| metabolic process (GO:0008152)                            | 8426                                                | 100            | 64.47 +             | 1.55                  | 2.48E-08                   | 3.92E-04               |                |
| nitrogen compound metabolic process (GO:0006807)          | 7148                                                | 83             | 54.69 +             | 1.52                  | 5.38E-06                   | 1.41E-02               |                |
| cellular process (GO:0009987)                             | 14350                                               | 136            | 109.8 +             | 1.24                  | 3.50E-06                   | 1.10E-02               |                |
| biological_process (GO:0008150)                           | 17700                                               | 155            | 135.43 +            | 1.14                  | 1.99E-06                   | 7.84E-03               |                |
| Unclassified (UNCLASSIFIED)                               | 3342                                                | 6              | 25.57 -             | 0.23                  | 1.99E-06                   | 1.05E-02               |                |

**Molecular function**

| Analysis Type:                       | PANTHER Overrepresentation Test (Released 20181113) |                |                     |                       |                            |                        |                |
|--------------------------------------|-----------------------------------------------------|----------------|---------------------|-----------------------|----------------------------|------------------------|----------------|
| Annotation Version and Release Date: | GO Ontology database Released 2018-11-15            |                |                     |                       |                            |                        |                |
| Analyzed List:                       | upload_1 (Homo sapiens)                             |                |                     |                       |                            |                        |                |
| Reference List:                      | Homo sapiens (all genes in database)                |                |                     |                       |                            |                        |                |
| Test Type:                           | FISHER                                              |                |                     |                       |                            |                        |                |
| Correction:                          | FDR                                                 |                |                     |                       |                            |                        |                |
| GO molecular function complete       | Homo sapiens - REFLIST (21042)                      | upload_1 (161) | upload_1 (expected) | upload_1 (over/under) | upload_1 (fold Enrichment) | upload_1 (raw P-value) | upload_1 (FDR) |
| RNA binding (GO:0003723)             | 1670                                                | 29             | 12.78 +             | 2.27                  | 3.13E-05                   | 3.66E-02               |                |
| protein binding (GO:0005515)         | 11870                                               | 117            | 90.82 +             | 1.29                  | 2.87E-05                   | 4.48E-02               |                |
| molecular_function (GO:0003674)      | 17654                                               | 154            | 135.08 +            | 1.14                  | 6.77E-06                   | 1.58E-02               |                |
| Unclassified (UNCLASSIFIED)          | 3388                                                | 7              | 25.92 -             | 0.27                  | 6.77E-06                   | 3.17E-02               |                |

**Cellular component**

| Analysis Type:                       | PANTHER Overrepresentation Test (Released 20181113) |                |                     |                       |                            |                        |                |
|--------------------------------------|-----------------------------------------------------|----------------|---------------------|-----------------------|----------------------------|------------------------|----------------|
| Annotation Version and Release Date: | GO Ontology database Released 2018-11-15            |                |                     |                       |                            |                        |                |
| Analyzed List:                       | upload_1 (Homo sapiens)                             |                |                     |                       |                            |                        |                |
| Reference List:                      | Homo sapiens (all genes in database)                |                |                     |                       |                            |                        |                |
| Test Type:                           | FISHER                                              |                |                     |                       |                            |                        |                |
| Correction:                          | FDR                                                 |                |                     |                       |                            |                        |                |
| GO molecular function complete       | Homo sapiens - REFLIST (21042)                      | upload_1 (161) | upload_1 (expected) | upload_1 (over/under) | upload_1 (fold Enrichment) | upload_1 (raw P-value) | upload_1 (FDR) |
| RNA binding (GO:0003723)             | 1670                                                | 29             | 12.78 +             | 2.27                  | 3.13E-05                   | 3.66E-02               |                |
| protein binding (GO:0005515)         | 11870                                               | 117            | 90.82 +             | 1.29                  | 2.87E-05                   | 4.48E-02               |                |
| molecular_function (GO:0003674)      | 17654                                               | 154            | 135.08 +            | 1.14                  | 6.77E-06                   | 1.58E-02               |                |
| Unclassified (UNCLASSIFIED)          | 3388                                                | 7              | 25.92 -             | 0.27                  | 6.77E-06                   | 3.17E-02               |                |

**(b) Gene Ontology analysis of 130 proteins down-regulated in organoid skin with EMSY knock-down; results where FDR p<0.05**

Biological process and molecular function show no significant enrichments after FDR

Cellular component

| Analysis Type:                                        | PANTHER Overrepresentation Test (Released 20181113) |                |                     |                       |                            |                        |                |
|-------------------------------------------------------|-----------------------------------------------------|----------------|---------------------|-----------------------|----------------------------|------------------------|----------------|
| Annotation Version and Release Date:                  | GO Ontology database Released 2018-11-15            |                |                     |                       |                            |                        |                |
| Analyzed List:                                        | upload_1 (Homo sapiens)                             |                |                     |                       |                            |                        |                |
| Reference List:                                       | Homo sapiens (all genes in database)                |                |                     |                       |                            |                        |                |
| Test Type:                                            | FISHER                                              |                |                     |                       |                            |                        |                |
| Correction:                                           | FDR                                                 |                |                     |                       |                            |                        |                |
| GO cellular component complete                        | Homo sapiens - REFLIST (21042)                      | upload_1 (132) | upload_1 (expected) | upload_1 (over/under) | upload_1 (fold Enrichment) | upload_1 (raw P-value) | upload_1 (FDR) |
| mitochondrial envelope (GO:0005740)                   | 747                                                 | 19             | 4.69                | +                     | 4.05                       | 2.89E-07               | 7.36E-05       |
| mitochondrial membrane (GO:0031966)                   | 705                                                 | 17             | 4.42                | +                     | 3.84                       | 2.62E-06               | 4.84E-04       |
| mitochondrial part (GO:0044429)                       | 1042                                                | 25             | 6.54                | +                     | 3.82                       | 9.14E-09               | 4.65E-06       |
| mitochondrial inner membrane (GO:0005743)             | 472                                                 | 11             | 2.96                | +                     | 3.72                       | 2.25E-04               | 2.08E-02       |
| Golgi membrane (GO:0000139)                           | 753                                                 | 17             | 4.72                | +                     | 3.6                        | 6.15E-06               | 9.63E-04       |
| Golgi subcompartment (GO:0098791)                     | 856                                                 | 18             | 5.37                | +                     | 3.35                       | 8.32E-06               | 1.21E-03       |
| organelle inner membrane (GO:0019866)                 | 532                                                 | 11             | 3.34                | +                     | 3.3                        | 6.04E-04               | 4.92E-02       |
| envelope (GO:0031975)                                 | 1190                                                | 23             | 7.47                | +                     | 3.08                       | 1.63E-06               | 3.69E-04       |
| organelle envelope (GO:0031967)                       | 1190                                                | 23             | 7.47                | +                     | 3.08                       | 1.63E-06               | 3.32E-04       |
| mitochondrion (GO:0005739)                            | 1595                                                | 30             | 10.01               | +                     | 3                          | 5.45E-08               | 2.22E-05       |
| Golgi apparatus part (GO:0044431)                     | 972                                                 | 18             | 6.1                 | +                     | 2.95                       | 4.36E-05               | 5.22E-03       |
| Golgi apparatus (GO:0005794)                          | 1564                                                | 23             | 9.81                | +                     | 2.34                       | 1.52E-04               | 1.48E-02       |
| organelle subcompartment (GO:0031984)                 | 1708                                                | 25             | 10.71               | +                     | 2.33                       | 7.42E-05               | 7.95E-03       |
| cytosol (GO:0005829)                                  | 5095                                                | 66             | 31.96               | +                     | 2.06                       | 2.68E-10               | 1.82E-07       |
| organelle membrane (GO:0031090)                       | 2978                                                | 37             | 18.68               | +                     | 1.98                       | 4.40E-05               | 4.97E-03       |
| cytoplasmic part (GO:0044444)                         | 9710                                                | 107            | 60.91               | +                     | 1.76                       | 3.73E-16               | 7.59E-13       |
| cytoplasm (GO:0005737)                                | 11571                                               | 114            | 72.59               | +                     | 1.57                       | 1.97E-14               | 2.01E-11       |
| intracellular organelle part (GO:0044446)             | 9262                                                | 85             | 58.1                | +                     | 1.46                       | 3.63E-06               | 6.16E-04       |
| organelle part (GO:0044422)                           | 9563                                                | 85             | 59.99               | +                     | 1.42                       | 1.46E-05               | 1.98E-03       |
| intracellular membrane-bounded organelle (GO:0043231) | 10966                                               | 93             | 68.79               | +                     | 1.35                       | 2.30E-05               | 2.93E-03       |
| intracellular (GO:0005622)                            | 14508                                               | 117            | 91.01               | +                     | 1.29                       | 2.00E-07               | 6.77E-05       |
| intracellular part (GO:0044424)                       | 14508                                               | 117            | 91.01               | +                     | 1.29                       | 2.00E-07               | 5.80E-05       |
| membrane-bounded organelle (GO:0043227)               | 12474                                               | 100            | 78.25               | +                     | 1.28                       | 8.38E-05               | 8.53E-03       |
| cell part (GO:0044464)                                | 16974                                               | 122            | 106.48              | +                     | 1.15                       | 2.33E-04               | 2.06E-02       |
| cell (GO:0005623)                                     | 17037                                               | 122            | 106.88              | +                     | 1.14                       | 0.000327               | 0.0278         |
