# Supplementary material for: EMSY expression affects multiple components of the skin barrier with relevance to atopic dermatitis
Source: PubMed Central journal article supplement (PMC6683598; doi:10.1016/j.jaci.2019.05.024), 2019-08

## SUPPLEMENTARY FIGURES AND TABLES – continued

### ***EMSY* expression affects multiple components of skin barrier with relevance to atopic dermatitis**

Martina S Elias PhD,<sup>1\*</sup> Sheila C Wright HNC,<sup>1</sup> Judit Remenyi PhD,<sup>1</sup> James C Abbott PhD<sup>2</sup>, Susan E Bray PhD<sup>3</sup>, Christian Cole PhD<sup>2</sup>, Sharon Edwards MBChB<sup>4</sup>, Marek Gierlinski PhD<sup>2</sup>, Mateusz Glok<sup>1</sup>, John A McGrath FRCP<sup>5</sup>, William V Nicholson PhD<sup>1</sup>, Lavinia Paternoster PhD<sup>6</sup>, Alan R Prescott PhD<sup>7</sup>, Sara Ten Have PhD<sup>8</sup>, Phillip D Whitfield PhD<sup>9</sup>, Angus I Lamond PhD<sup>8</sup> and Sara J Brown FRCPE<sup>1,10\*</sup>

**Fig E9. Transmission electron microscopy images of organoid skin model with osmium staining, showing ultrastructure of stratum corneum**

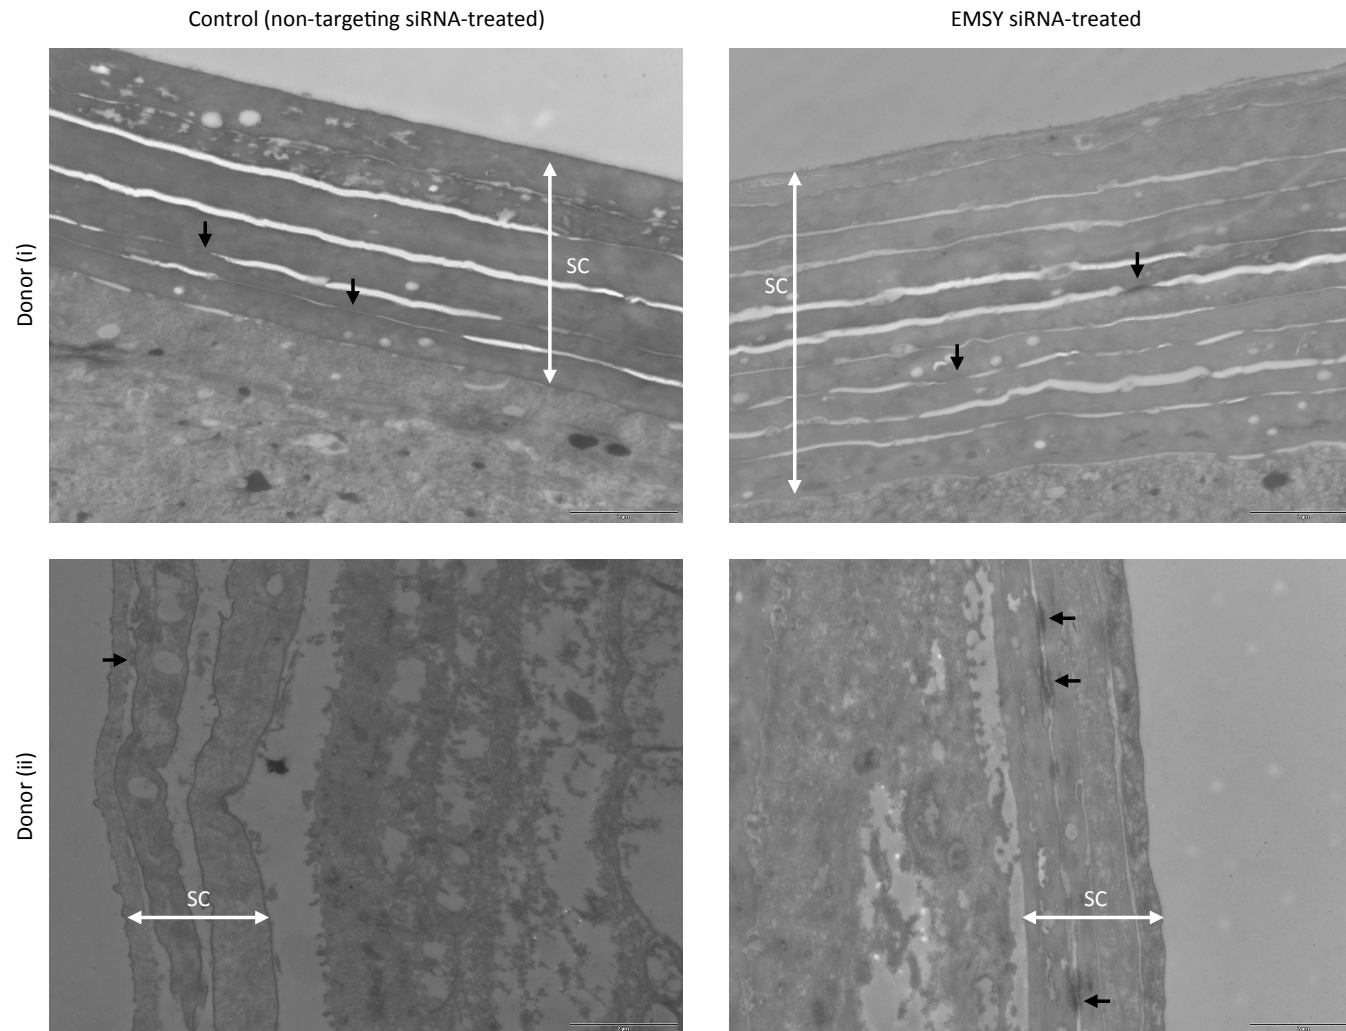

[Note: These upper two Images are reproduced here from Figure 2F, to allow comparison with replicate experiment.]

EMSY knock-down produces a thicker stratum corneum (SC) with an increased number of component layers, consistent with the increase in corneodesmosin detected by mass spectrometry; black arrows indicate corneodesmosomes; representative images from four biological replicate experiments.

**Fig E10. Immunohistochemistry to investigate EMSY expression in skin**

**Normal control skin** obtained from plastic surgical excision of breast or abdominal skin

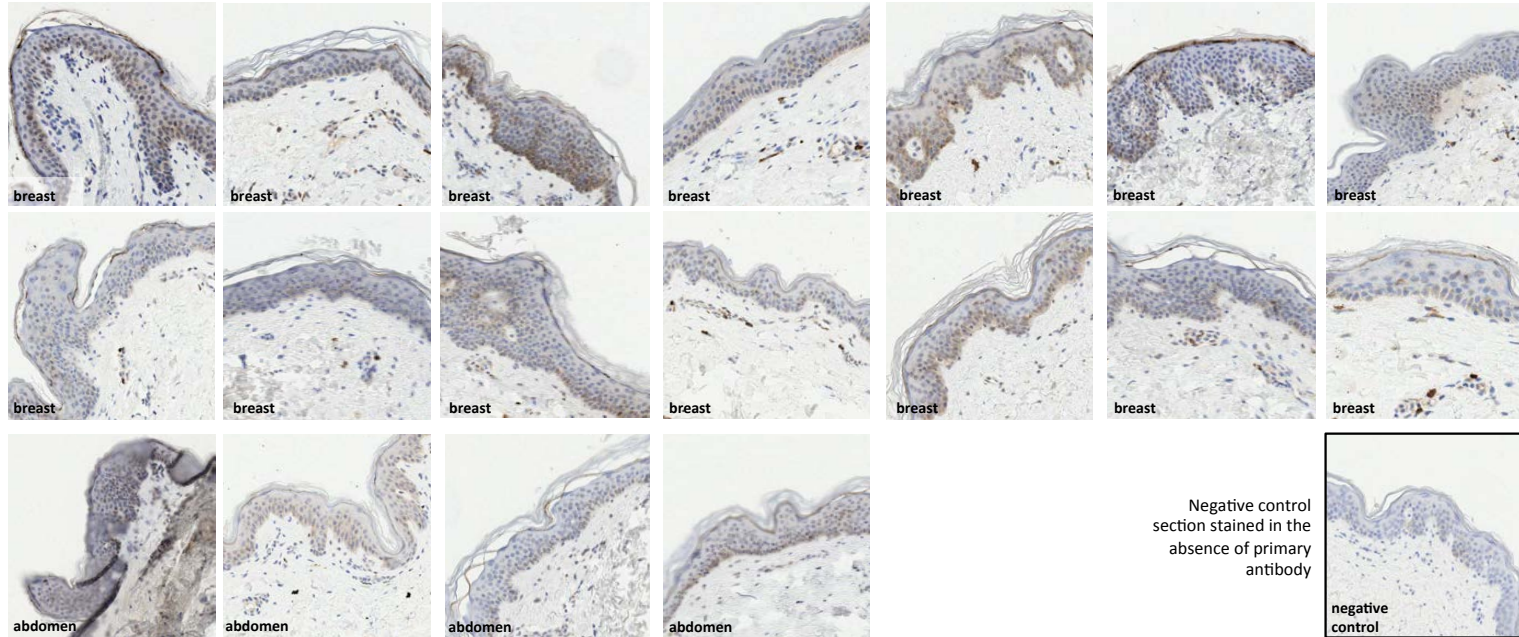

**Dermatitis cases** with clinical and/or histological features of AD from different body sites as labelled

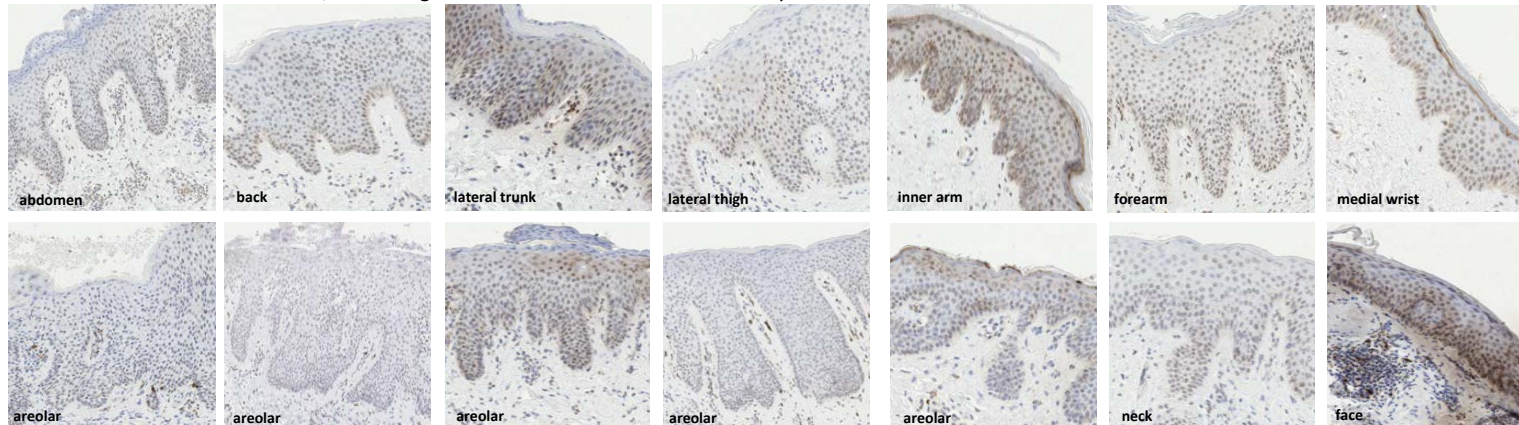

Supplement: mmc4.pdf [file mmc4.pdf]
